# Supplementary material
Source: HighWire-hosted journal article supplement (https://www.annfammed.org/highwire/filestream/15879/field_highwire_adjunct_files/0/SchmitzSuppApp.pdf)
Supplement: SchmitzSuppApp.pdf [file SchmitzSuppApp.pdf]

**Supplemental materials for**

**Schmitz DF, Casapulla S, Patterson DG, Longenecker RL. Building rural primary care research by connecting rural programs. *Ann Fam Med*. 2023;21(Supp 2):S82-S83.**

Supplemental Appendix. Link to Web-based Enduring Materials:

<https://rttcollaborative.net/meetings/annual-scholarly-intensive/>
